# Supplementary material for: The effect of anions in the synthesis and structure of pyrazolylamidino copper(ii) complexes
Source: Royal Society of Chemistry journal article supplement (doi:10.1039/d3dt00103b), 2023-01-01
Supplement: d3dt00103b1.pdf [file d3dt00103b1.pdf]

# The effect of anions in the synthesis and structure of pyrazolylamidino copper(II) complexes

Chang-Chih Hsieh,<sup>b</sup> Po-Kuang Liao,<sup>a</sup> Chia-Wei Chen,<sup>a</sup> Ming-Hsi Chiang<sup>b,c</sup> and Yih-Chern Horng<sup>\*a</sup>

<sup>a</sup> Department of Chemistry, National Changhua University of Education, Changhua 50058, Taiwan

<sup>b</sup> Institute of Chemistry, Academia Sinica, Taipei 11528, Taiwan

<sup>c</sup> Department of Medicinal and Applied Chemistry, Kaohsiung Medical University, Kaohsiung 80708, Taiwan

\* Email: ychorng@cc.ncue.edu.tw

## Electronic Supporting Information

### Table of Contents

|                   | <b>Title</b>                                                                                                                                                                       | <b>P.</b> |
|-------------------|------------------------------------------------------------------------------------------------------------------------------------------------------------------------------------|-----------|
| <b>Table S1-4</b> | The summary of crystallographic data for <b>1~10</b> and [Cu(pzH) <sub>4</sub> (BF <sub>4</sub> ) <sub>2</sub> ].                                                                  | 2~5       |
| <b>Figure S1</b>  | Time-dependent <sup>1</sup> H NMR studies of nitrile exchange reaction in CD <sub>3</sub> CN.                                                                                      | 6         |
| <b>Figure S2</b>  | Time-dependent <sup>1</sup> H NMR studies for the anion substitution reaction of <b>2</b> .                                                                                        | 6         |
| <b>Figure S3</b>  | Stair-like one-dimensional polymer of <b>2</b> .                                                                                                                                   | 7         |
| <b>Figure S4</b>  | Crystal structures of <b>7</b> and <b>8</b> .                                                                                                                                      | 8         |
| <b>Table S5</b>   | Selected bond lengths [Å] and angles [°] for complex <b>7</b> and <b>8</b> .                                                                                                       | 9         |
| <b>Figure S5</b>  | Crystal structure and packing diagram of <b>9</b> .                                                                                                                                | 10        |
| <b>Figure S6</b>  | Crystal structure and Packing diagrams of <b>10</b> .                                                                                                                              | 11        |
| <b>Table S6</b>   | Selected bond lengths [Å] and angles [°] for complex <b>9</b> and <b>10</b> .                                                                                                      | 12        |
| <b>Figure S7</b>  | X-band EPR spectra of the polycrystalline samples of complex <b>1~6</b> at 77 K.                                                                                                   | 13        |
| <b>Figure S8</b>  | X-band EPR spectrum of the polycrystalline samples of [Cu(pzH) <sub>4</sub> (ClO <sub>4</sub> ) <sub>2</sub> ] at 77 K.                                                            | 14        |
| <b>Figure S9</b>  | Time-dependent absorption changes for the formation of [Cu(HN=C(Me)pz) <sub>2</sub> (pzH) <sub>2</sub> ] <sup>2+</sup> species, <b>1a</b> .                                        | 15        |
| <b>Figure S10</b> | Time-dependent <sup>1</sup> H NMR studies of [Cu(pzH) <sub>4</sub> (ClO <sub>4</sub> ) <sub>2</sub> ] in CD <sub>3</sub> CN.                                                       | 15        |
| <b>Figure S11</b> | Time-dependent UV-vis spectra for the formation of [Cu(HN=C(Me)pz) <sub>2</sub> (pzH) <sub>2</sub> ] <sup>2+</sup> species from Cu(BF <sub>4</sub> ) <sub>2</sub> and pzH in MeCN. | 16        |
| <b>Figure S12</b> | EPR (77 K) and UV-vis spectra of <b>1</b> , <b>1a</b> , and <b>1</b> added with 2-fold pzH in MeCN                                                                                 | 16        |
| <b>Figure S13</b> | Crystal structure of [Cu(pzH) <sub>4</sub> (BF <sub>4</sub> ) <sub>2</sub> ].                                                                                                      | 17        |

## Supplementary Tables and Figures

**Table S1.** The summary of crystallographic data for the complexes **1~3**.

|                                                                | <b>1</b>           | <b>2</b>           | <b>3</b>           |
|----------------------------------------------------------------|--------------------|--------------------|--------------------|
| formula                                                        | C10H14Cl2CuN6O8    | C12H18Cl2CuN6O8    | C10H14Cl4Cu2N6     |
| fw                                                             | 480.71             | 508.76             | 487.17             |
| temp, K                                                        | 150(2) K           | 150(2) K           | 150(2) K           |
| cryst syst                                                     | Monoclinic         | Monoclinic         | Triclinic          |
| space group                                                    | C2/c               | P2 <sub>1</sub> /n | P-1                |
| <i>a</i> , Å                                                   | 15.9429(8)         | 7.0614(3)          | 8.279(3)           |
| <i>b</i> , Å                                                   | 6.0099(3)          | 15.8795(6)         | 9.550(3)           |
| <i>c</i> , Å                                                   | 18.4308(9)         | 8.9357(3)          | 11.678(4)          |
| $\alpha$ , °                                                   | 90                 | 90                 | 94.69(2)           |
| $\beta$ , °                                                    | 93.165(3)          | 108.1762(19)       | 104.15(2)          |
| $\gamma$ , °                                                   | 90                 | 90                 | 106.77(3)          |
| Volume, Å <sup>3</sup> / <i>Z</i>                              | 1763.26(15) / 4    | 951.98(6) / 2      | 845.6(5) / 2       |
| Density (cald.), Mg/m <sup>3</sup>                             | 1.811              | 1.775              | 1.913              |
| Absorption coefficient, mm <sup>-1</sup>                       | 1.596              | 1.484              | 3.149              |
| crystal size, mm                                               | 0.12 x 0.10 x 0.06 | 0.13 x 0.06 x 0.02 | 0.08 x 0.08 x 0.06 |
| $\theta$ range, deg                                            | 2.213 to 28.726    | 2.565 to 28.773    | 2.258 to 28.280    |
| no. of reflns collected                                        | 12158              | 11225              | 8038               |
| no. of indep reflns                                            | 2275               | 2474               | 4066               |
| max. and min. trans                                            | 0.910 and 0.832    | 0.971 and 0.830    | 0.810 and 0.754    |
| no. of data /restraints /params                                | 2275 / 0 / 129     | 2474 / 0 / 134     | 4066 / 0 / 201     |
| goodness-of-fit on $F^2$                                       | 1.029              | 1.479              | 0.797              |
| final <i>R</i> indices [ $I > 2\sigma(I)$ ] $R_1^a$ , $wR_2^b$ | 0.0337, 0.0750     | 0.0306, 0.0587     | 0.0546, 0.1453     |
| <i>R</i> indices (all data), $R_1^a$ , $wR_2^b$                | 0.0373, 0.0774     | 0.0343, 0.0598     | 0.1123, 0.1790     |
| largest diff. peak and hole, e Å <sup>-3</sup>                 | 0.436 and -0.585   | 0.540 and -0.456   | 1.896 and -0.895   |

$$^a R_1 = \frac{\sum |F_o| - |F_c|}{\sum |F_o|}$$

$$^b wR_2 = \frac{[\sum [\omega(F_o^2 - F_c^2)^2]]}{\sum [\omega(F_o^2)^2]}^{1/2}$$

**Table S2.** The summary of crystallographic data for the complexes 4~6.

|                                                                | <b>4</b>           | <b>5</b>           | <b>6</b>           |
|----------------------------------------------------------------|--------------------|--------------------|--------------------|
| formula                                                        | C6H9Cl2CuN3        | C16H22Cl4Cu2N10O8  | C18H26Cl4Cu2N10O8  |
| fw                                                             | 257.61             | 751.31             | 779.38             |
| temp, K                                                        | 150(2)             | 150(2)             | 150(2) K           |
| cryst syst                                                     | Monoclinic         | Monoclinic         | Monoclinic         |
| space group                                                    | P2 <sub>1</sub> /n | P2 <sub>1</sub> /n | P2 <sub>1</sub> /c |
| <i>a</i> , Å                                                   | 8.4981(3)          | 6.8239(3)          | 6.6960(5)          |
| <i>b</i> , Å                                                   | 6.8635(3)          | 22.2246(12)        | 14.7680(11)        |
| <i>c</i> , Å                                                   | 16.2694(6)         | 9.5718(4)          | 14.4998(10)        |
| $\alpha$ , °                                                   | 90                 | 90                 | 90                 |
| $\beta$ , °                                                    | 103.120(2)         | 110.437(3)         | 93.504(4)          |
| $\gamma$ , °                                                   | 90                 | 90                 | 90                 |
| Volume, Å <sup>3</sup> / <i>Z</i>                              | 924.17(6) / 4      | 1360.27(11) / 2    | 1431.15(18) / 2    |
| Density (cald.), Mg/m <sup>3</sup>                             | 1.851              | 1.834              | 1.809              |
| Absorption coefficient, mm <sup>-1</sup>                       | 2.887              | 2.018              | 1.922              |
| crystal size, mm                                               | 0.34 x 0.18 x 0.01 | 0.35 x 0.12 x 0.04 | 0.38 x 0.04 x 0.02 |
| $\theta$ range, deg                                            | 2.504 to 28.692    | 2.449 to 28.703    | 1.970 to 28.753    |
| no. of reflns collected                                        | 9864               | 14575              | 17360              |
| no. of indep reflns                                            | 2391               | 3492               | 3650               |
| max. and min. trans                                            | 0.972 and 0.540    | 0.924 and 0.539    | 0.963 and 0.529    |
| no. of data /restraints /params                                | 2391 / 0 / 110     | 3492 / 0 / 182     | 3650 / 0 / 191     |
| goodness-of-fit on $F^2$                                       | 0.670              | 1.054              | 1.047              |
| final <i>R</i> indices [ $I > 2\sigma(I)$ ] $R_1^a$ , $wR_2^b$ | 0.0306, 0.0859     | 0.0323, 0.1272     | 0.0607, 0.1598     |
| <i>R</i> indices (all data), $R_1^a$ , $wR_2^b$                | 0.0453, 0.0982     | 0.0375, 0.1320     | 0.0675, 0.1641     |
| largest diff. peak and hole, e Å <sup>-3</sup>                 | 0.579 and -0.528   | 0.427 and -0.746   | 1.918 and -0.711   |

$$^a R_1 = \frac{\sum |F_o| - |F_c|}{\sum |F_o|}$$

$$^b wR_2 = \left[ \frac{\sum [\omega(F_o^2 - F_c^2)^2]}{\sum [\omega(F_o^2)^2]} \right]^{1/2}$$

**Table S3.** The summary of crystallographic data for complexes 7~9.

|                                                                | 7                  | 8                  | 9                   |
|----------------------------------------------------------------|--------------------|--------------------|---------------------|
| formula                                                        | C10H14B2CuF8N6     | C12H18B2CuF8N6     | C16H22B2Cl2Cu2F8N10 |
| fw                                                             | 455.43             | 483.48             | 726.06              |
| temp, K                                                        | 150(2)             | 150(2)             | 150(2)              |
| cryst syst                                                     | Monoclinic         | Monoclinic         | Monoclinic          |
| space group                                                    | C2/c               | P2 <sub>1</sub> /c | P2 <sub>1</sub> /n  |
| <i>a</i> , Å                                                   | 15.5827(7)         | 6.2314(3)          | 6.8088(6)           |
| <i>b</i> , Å                                                   | 5.9982(3)          | 19.6874(8)         | 21.937(2)           |
| <i>c</i> , Å                                                   | 18.2326(8)         | 8.2359(4)          | 9.5062(9)           |
| $\alpha$ , °                                                   | 90                 | 90                 | 90                  |
| $\beta$ , °                                                    | 92.341(3)          | 108.692(3)         | 110.098(6)          |
| $\gamma$ , °                                                   | 90                 | 90                 | 90                  |
| Volume, Å <sup>3</sup> / <i>Z</i>                              | 1702.75(14) / 4    | 957.09(8) / 2      | 1333.5(2) / 2       |
| Density (cald.), Mg/m <sup>3</sup>                             | 1.777              | 1.678              | 1.808               |
| Absorption coefficient, mm <sup>-1</sup>                       | 1.373              | 1.227              | 1.880               |
| crystal size, mm                                               | 0.30 x 0.04 x 0.02 | 0.10 x 0.02 x 0.02 | 0.20 x 0.09 x 0.09  |
| $\theta$ range, deg                                            | 2.236 to 28.728    | 2.069 to 28.742    | 1.857 to 28.709     |
| no. of reflns collected                                        | 10949              | 12644              | 14776               |
| no. of indep reflns                                            | 2201               | 2472               | 3422                |
| max. and min. trans                                            | 0.973 and 0.683    | 0.976 and 0.887    | 0.730 and 0.522     |
| no. of data / restraints / params                              | 2201 / 0 / 125     | 2471 / 0 / 134     | 3422 / 0 / 182      |
| goodness-of-fit on $F^2$                                       | 0.869              | 0.961              | 1.089               |
| final <i>R</i> indices [ $I > 2\sigma(I)$ ] $R_1^a$ , $wR_2^b$ | 0.0344, 0.0862     | 0.0383, 0.1038     | 0.0555, 0.1557      |
| <i>R</i> indices (all data), $R_1^a$ , $wR_2^b$                | 0.0457, 0.0941     | 0.0571, 0.1145     | 0.0767, 0.1670      |
| largest diff. peak and hole, e Å <sup>-3</sup>                 | 0.568 and -0.390   | 0.400 and -0.503   | 1.234 and -0.820    |

$$^a R_1 = \frac{\sum |F_o| - |F_c|}{\sum |F_o|}$$

$$^b wR_2 = \left[ \frac{\sum [\omega(F_o^2 - F_c^2)^2]}{\sum [\omega(F_o^2)^2]} \right]^{1/2}$$

**Table S4.** The summary of crystallographic data for complex **10** and [Cu(pzH)<sub>4</sub>(BF<sub>4</sub>)<sub>2</sub>].

|                                                                | <b>10</b>           | [Cu(pzH) <sub>4</sub> (BF <sub>4</sub> ) <sub>2</sub> ] |
|----------------------------------------------------------------|---------------------|---------------------------------------------------------|
| formula                                                        | C18H26B2Cl2Cu2F8N10 | C12H16B2CuF8N8                                          |
| fw                                                             | 754.11              | 509.49                                                  |
| temp, K                                                        | 150(2)              | 150(2)                                                  |
| cryst syst                                                     | Monoclinic          | Monoclinic                                              |
| space group                                                    | P2 <sub>1</sub> /c  | C2/c                                                    |
| <i>a</i> , Å                                                   | 6.6757(4)           | 14.0051(8)                                              |
| <i>b</i> , Å                                                   | 14.7202(8)          | 9.8734(5)                                               |
| <i>c</i> , Å                                                   | 14.3589(8)          | 15.5093(9)                                              |
| $\alpha$ , °                                                   | 90                  | 90                                                      |
| $\beta$ , °                                                    | 93.853(3)           | 114.108(3)                                              |
| $\gamma$ , °                                                   | 90                  | 90                                                      |
| Volume, Å <sup>3</sup> / <i>Z</i>                              | 1407.83(14) / 2     | 1957.54(19) / 4                                         |
| Density (cald.), Mg/m <sup>3</sup>                             | 1.779               | 1.729                                                   |
| Absorption coefficient, mm <sup>-1</sup>                       | 1.784               | 1.208                                                   |
| crystal size, mm                                               | 0.18 x 0.06 x 0.06  | 0.15 x 0.04 x 0.04                                      |
| $\theta$ range, deg                                            | 1.984 to 28.868     | 2.607 to 28.754                                         |
| no. of reflns collected                                        | 19931               | 12837                                                   |
| no. of indep reflns                                            | 3653                | 2545                                                    |
| max. and min. trans                                            | 0.941 and 0.838     | 0.953 and 0.840                                         |
| no. of data /restraints /params                                | 3653 / 0 / 191      | 2545 / 0 / 142                                          |
| goodness-of-fit on $F^2$                                       | 0.851               | 1.001                                                   |
| final <i>R</i> indices [ $I > 2\sigma(I)$ ] $R_1^a$ , $wR_2^b$ | 0.0354, 0.1029      | 0.0435, 0.1635                                          |
| <i>R</i> indices (all data), $R_1^a$ , $wR_2^b$                | 0.0392, 0.1059      | 0.0528, 0.1805                                          |
| largest diff. peak and hole, e Å <sup>-3</sup>                 | 0.880 and -0.543    | 1.384 and -0.739                                        |

$$^a R_1 = \frac{\sum |F_0| - |F_c|}{\sum |F_0|}$$

$$^b wR_2 = \frac{[\sum [\omega(F_0^2 - F_c^2)^2]]}{\sum [\omega(F_0^2)^2]}^{1/2}$$

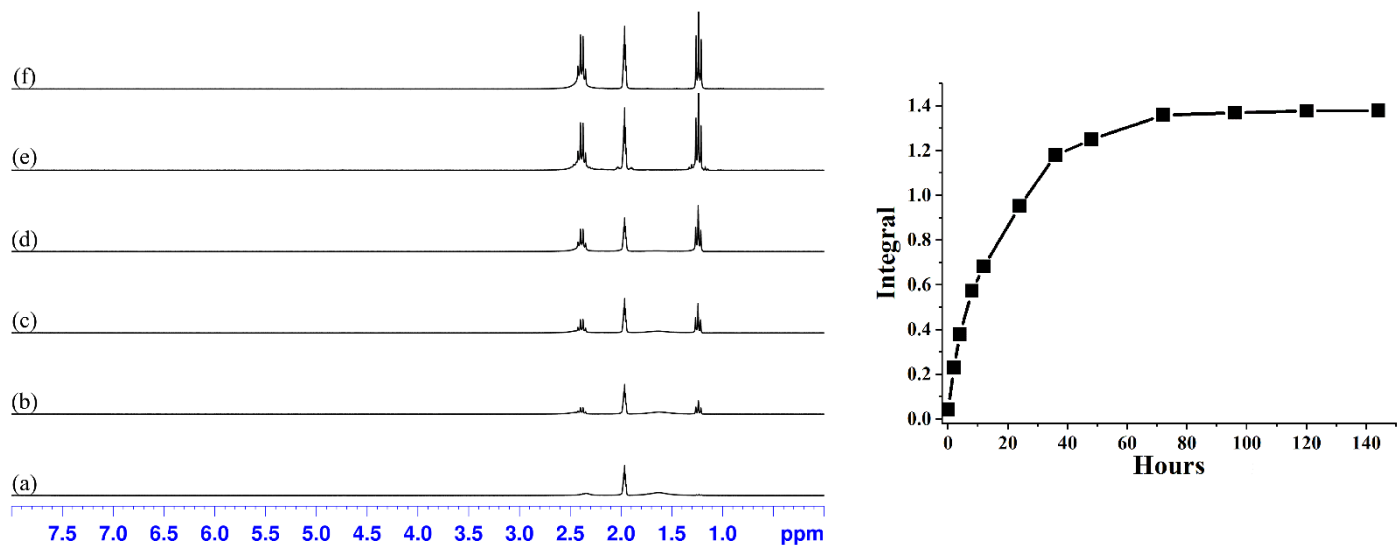

**Figure S1.** The *in situ* time-dependent  $^1\text{H}$  NMR experiments of nitrile exchange reaction, which converts compound **2** to compound  $d_6\text{-1}$ , at 298 K in  $\text{CD}_3\text{CN}$  (1.95 ppm): (a) 0 hr, (b) 4 hrs, (c) 12hrs, (d) 36 hrs, (e) 72 hrs, (f) 144 hrs (left). The time-dependent yield of  $d_6\text{-1}$  from **2** in *in situ*  $^1\text{H}$  NMR experiments at 298 K in  $\text{CD}_3\text{CN}$  (right). The integration is based on the peaks at 1.2 ppm ( $\text{CH}_3\text{CH}_2\text{CN}$ ).

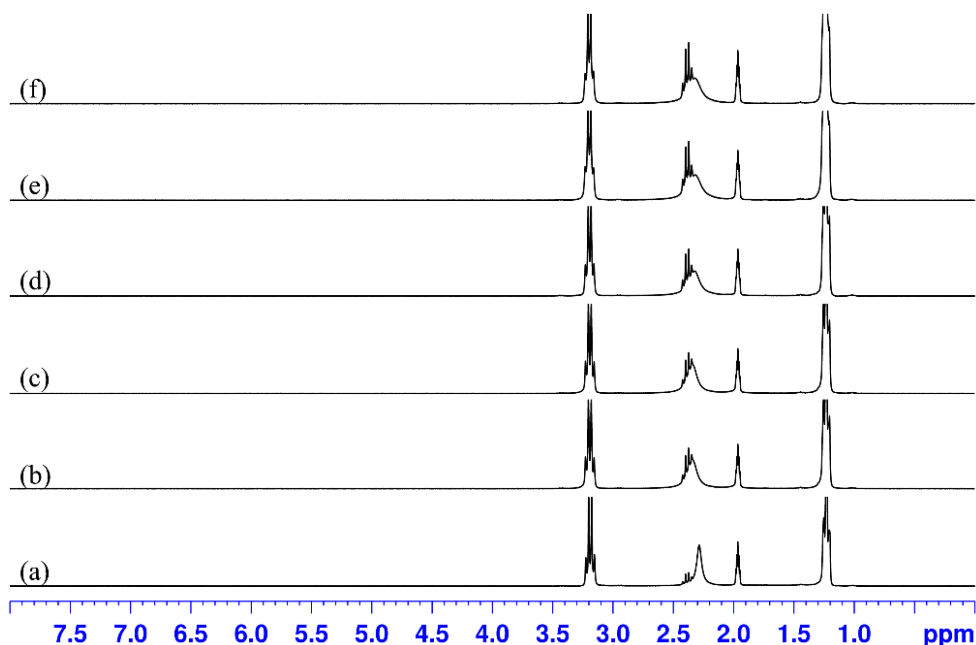

**Figure S2.** The substitution reaction of compound **2** reacted with 1 equiv.  $\text{Et}_4\text{NCl}$  in *in situ* time-dependent  $^1\text{H}$  NMR studies in  $\text{CD}_3\text{CN}$  (1.95 ppm) at 298 K, (a) 5 mins, (b) 2 hrs, (c) 4 hrs, (d) 8 hrs, (e) 24 hrs, (f) 72 hrs. The peaks at 1.3 and 3.2 ppm are the ethyl group from  $[\text{Et}_4\text{N}]^+$ , and the broad peak at 2.3 ppm is  $\text{H}_2\text{O}$ .

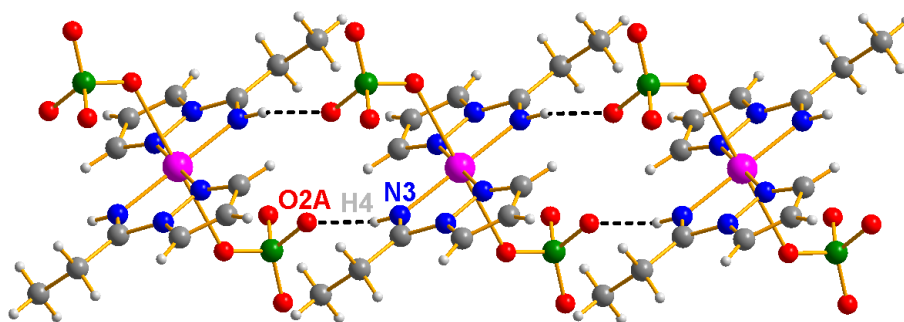

**Figure S3.** Stair-like one-dimensional polymer of **2** with black dash lines showing the NH...O hydrogen-bond interactions. Only the major component is shown.  $N3 \cdots O2A = 3.0024(33)$  Å,  $H4 \cdots O2A = 2.1253(28)$  Å,  $N3-H4 \cdots O2A = 174.3^\circ$ . Symmetry code: A  $1+x, y, z$ .

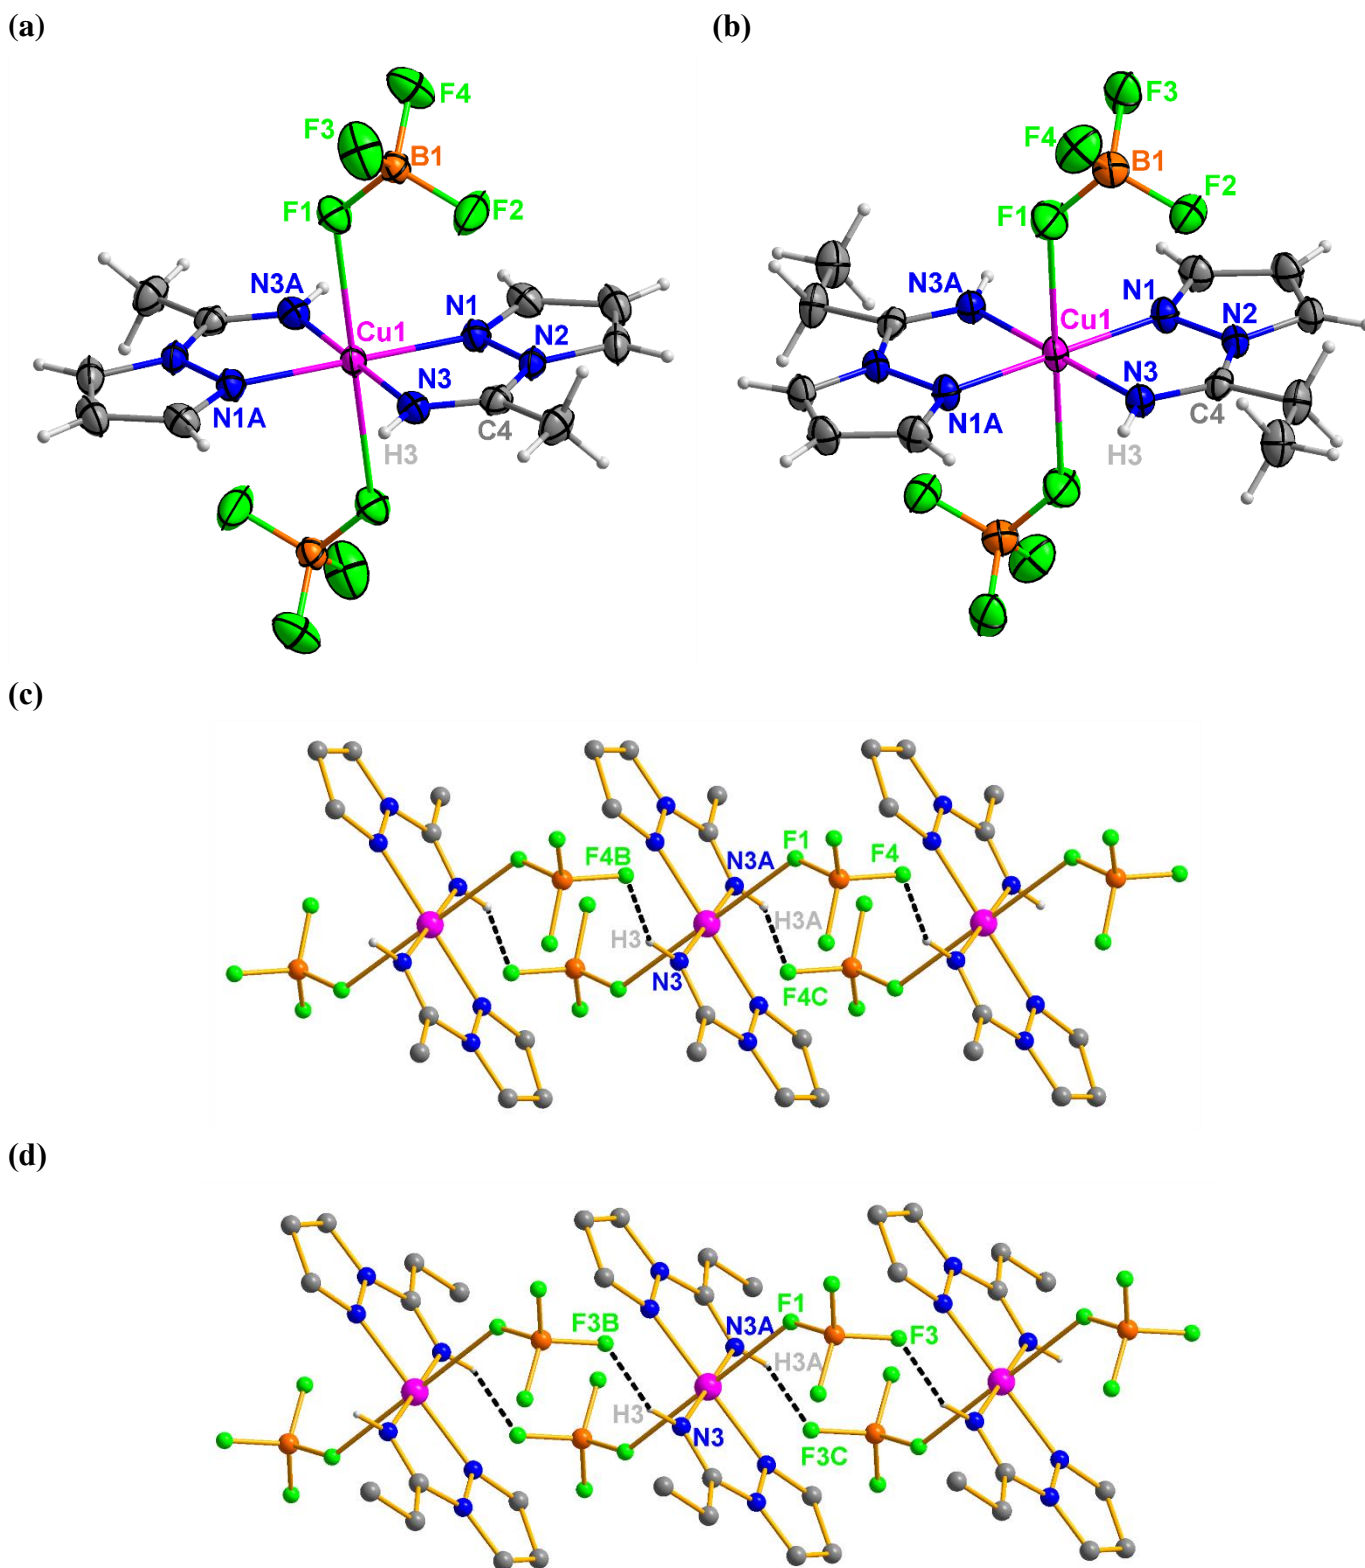

**Figure S4.** ORTEP style representation of **7** (a) and **8** (b). Thermal ellipsoids are drawn at the 35 % probability level. Stair-like one-dimensional polymer of **7** (c) and **8** (d) with black dash lines showing the NH...F hydrogen-bond interactions. Only the major component is shown. Hydrogen atoms bound to carbon atoms are omitted for clarity.  $N3 \cdots F4B = 2.8932(26)$  Å,  $H3 \cdots F4B = 2.0916(18)$  Å,  $N3-H3 \cdots F4B = 151.1(1)^\circ$  for **7**;  $N3 \cdots F3B = 2.9740(19)$  Å,  $H3 \cdots F3B = 2.1405(12)$  Å,  $N3-H3 \cdots F3B = 157.8(1)^\circ$  for **8**. Symmetry code: A  $2-x, 2-y, 1-z$  for **7** and  $1-x, 1-y, 1-z$  for **8**; B  $x, 1+y, z$  for **7** and  $-1+x, y, z$  for **8**; C  $2-x, 1-y, 1-z$ .



**Table S5.** Selected bond lengths [Å] and angles [°] for complex **7** and **8**.<sup>a</sup>

|            | <b>7</b>   | <b>8</b>   |
|------------|------------|------------|
| Cu1-N1     | 1.9728(17) | 1.9777(18) |
| Cu1-N3     | 1.9710(18) | 1.9853(18) |
| Cu1-F1     | 2.5680(14) | 2.4758(14) |
| N3-C4      | 1.270(3)   | 1.265(3)   |
| N2-C4      | 1.392(3)   | 1.402(3)   |
| N1-Cu1-N3  | 80.37(8)   | 80.55(7)   |
| N1-Cu1-N3A | 99.63(8)   | 99.45(8)   |
| N1-Cu1-F1  | 93.70(6)   | 91.14(7)   |
| N3-Cu1-F1  | 88.64(6)   | 87.83(6)   |
| N3A-Cu1-F1 | 91.37(6)   | 92.17(6)   |
| N1A-Cu1-F1 | 86.30(6)   | 88.86(7)   |

<sup>a</sup> Symmetry code: A= 2-x, 2-y, 1-z for **7** and 1-x, 1-y, 1-z for **8**.

(a)

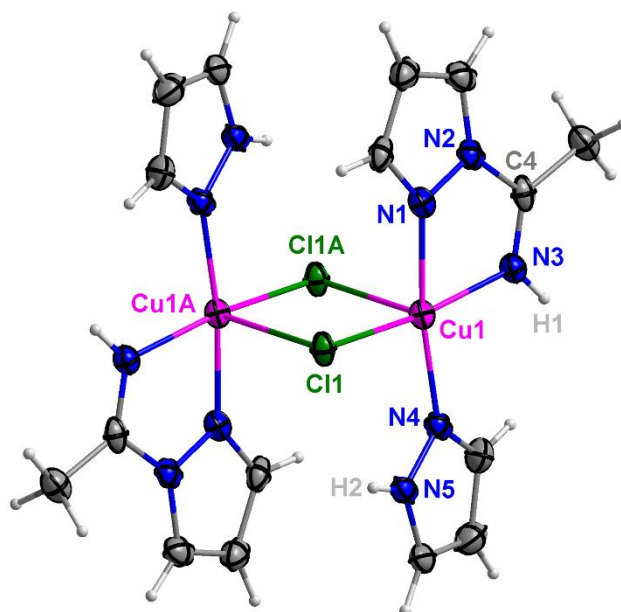

(b)

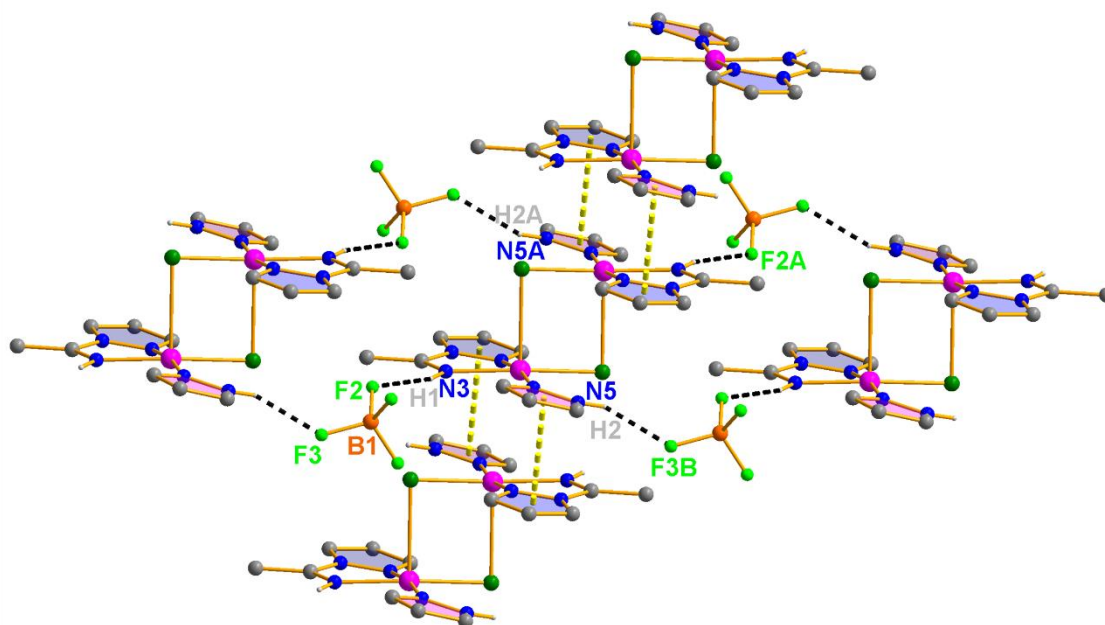

**Figure S5.** (a) ORTEP style representation of **9**. Thermal ellipsoids are drawn at the 35 % probability level. The counterions ( $\text{BF}_4^-$ ) are omitted for clarity. (b) Two-dimensional packing diagram showing the hydrogen bonding (black dash lines) and  $\pi\cdots\pi$  (yellow dash lines) interactions. Only the major component is shown. Hydrogen atoms bound to carbon atoms are omitted for clarity.  $\text{N3}\cdots\text{F2}$  2.8744(44) Å,  $\text{H1}\cdots\text{F2}$  2.0414(28) Å,  $\text{N3-H1}\cdots\text{F2}$  157.6(2)°;  $\text{N5}\cdots\text{F3B}$  2.8042(44) Å,  $\text{H2}\cdots\text{F3B}$  2.0703(26) Å,  $\text{N5-H2}\cdots\text{F3B}$  140.3(2)°. The distance between the centroids of bound pzH and  $\text{L}^{\text{Me}}$  pz moiety of nearby molecules is 3.8377(3) Å. Symmetry code: A  $-x, 2-y, 2-z$ ; B  $x, y, 1+z$ .

(a)

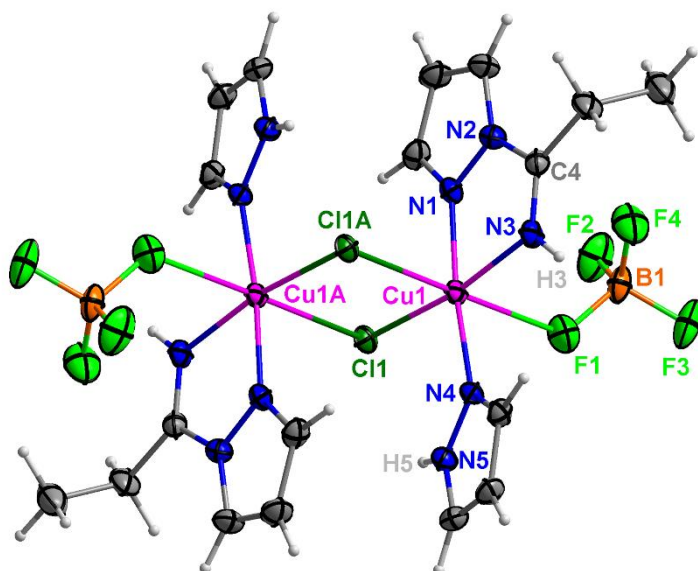

(b)

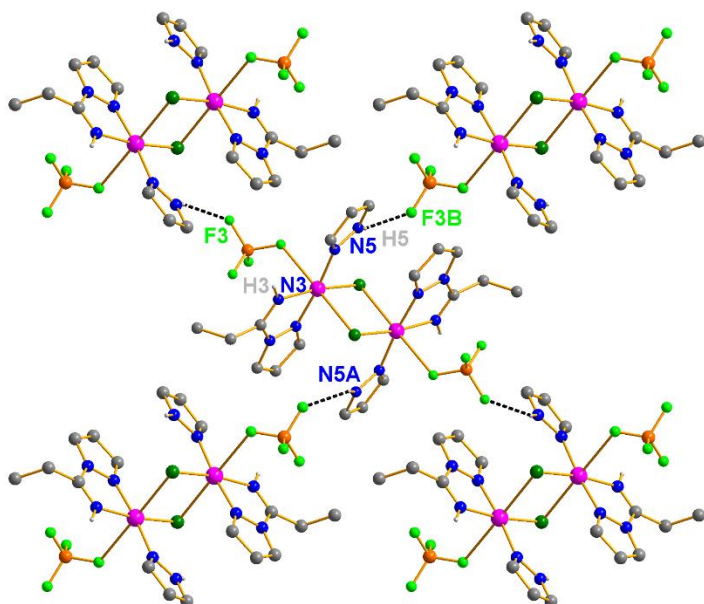

(c)

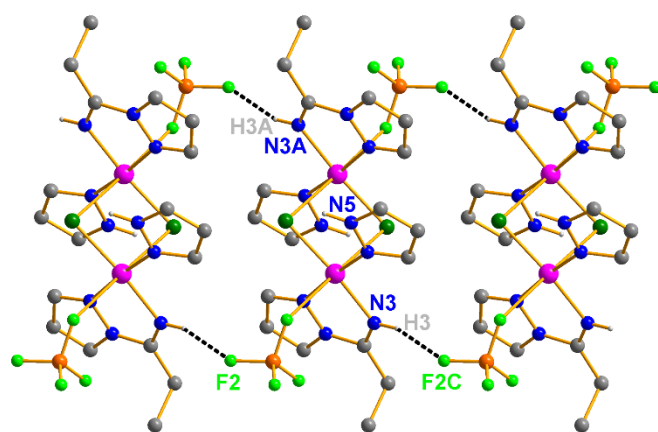

**Figure S6.** (a) ORTEP style representation of **10**. Thermal ellipsoids are drawn at the 35 % probability level. Packing diagrams are depicted along bc plane (b) and along ac plane (c) with black dash lines showing the NH...F hydrogen-bond interactions. Only the major component is shown. Hydrogen atoms bound to carbon atoms are omitted for clarity. N5...F3B 2.9047(29) Å, H5...F3B 2.2062(21) Å, N5-H5...F3B 136.1(1)°; N3...F2C 2.8905(29) Å, H3...F2C 2.0402(21) Å, N3-H3...F2C 162.0(1)°. Symmetry code: A 1-x, -y, 1-z; B x, 0.5-y, -0.5+z; C 1+x, y, z.

**Table S6.** Bond lengths [Å] and angles [°] for complex **9** and **10**.<sup>a</sup>

|              | <b>9</b>   | <b>10</b> |
|--------------|------------|-----------|
| Cu1-N1       | 1.992(3)   | 1.970(2)  |
| Cu1-N3       | 2.001(3)   | 2.011(2)  |
| Cu1-N4       | 1.972(3)   | 1.971(2)  |
| Cu1-Cl1      | 2.2631(10) | 2.2685(6) |
| Cu1-Cl1A     | 2.7468(11) | 2.8339(7) |
| N1-N2        | 1.359(4)   | 1.360(3)  |
| N2-C4        | 1.409(5)   | 1.400(3)  |
| N3-C4        | 1.269(5)   | 1.263(3)  |
| N4-N5        | 1.348(4)   | 1.352(3)  |
| Cu1-F1       |            | 2.724(2)  |
| N1-Cu1-N3    | 79.41(12)  | 79.63(9)  |
| N1-Cu1-Cl1   | 91.18(9)   | 91.26(6)  |
| N1-Cu1-Cl1A  | 92.71(9)   | 91.84(6)  |
| N3-Cu1-N4    | 95.94(12)  | 96.50(9)  |
| N3-Cu1-Cl1A  | 91.16(9)   | 85.04(6)  |
| N4-Cu1-Cl1   | 92.98(9)   | 92.72(6)  |
| N4-Cu1-Cl1A  | 94.02(10)  | 91.85(6)  |
| Cl1-Cu1-Cl1A | 92.94(3)   | 93.52(2)  |
| Cu1-Cl1-Cu1A | 87.06(3)   | 86.48(2)  |

<sup>a</sup> Symmetry code: A= -x, 2-y, 2-z for **9**; 1-x, -y, 1-z for **10**.

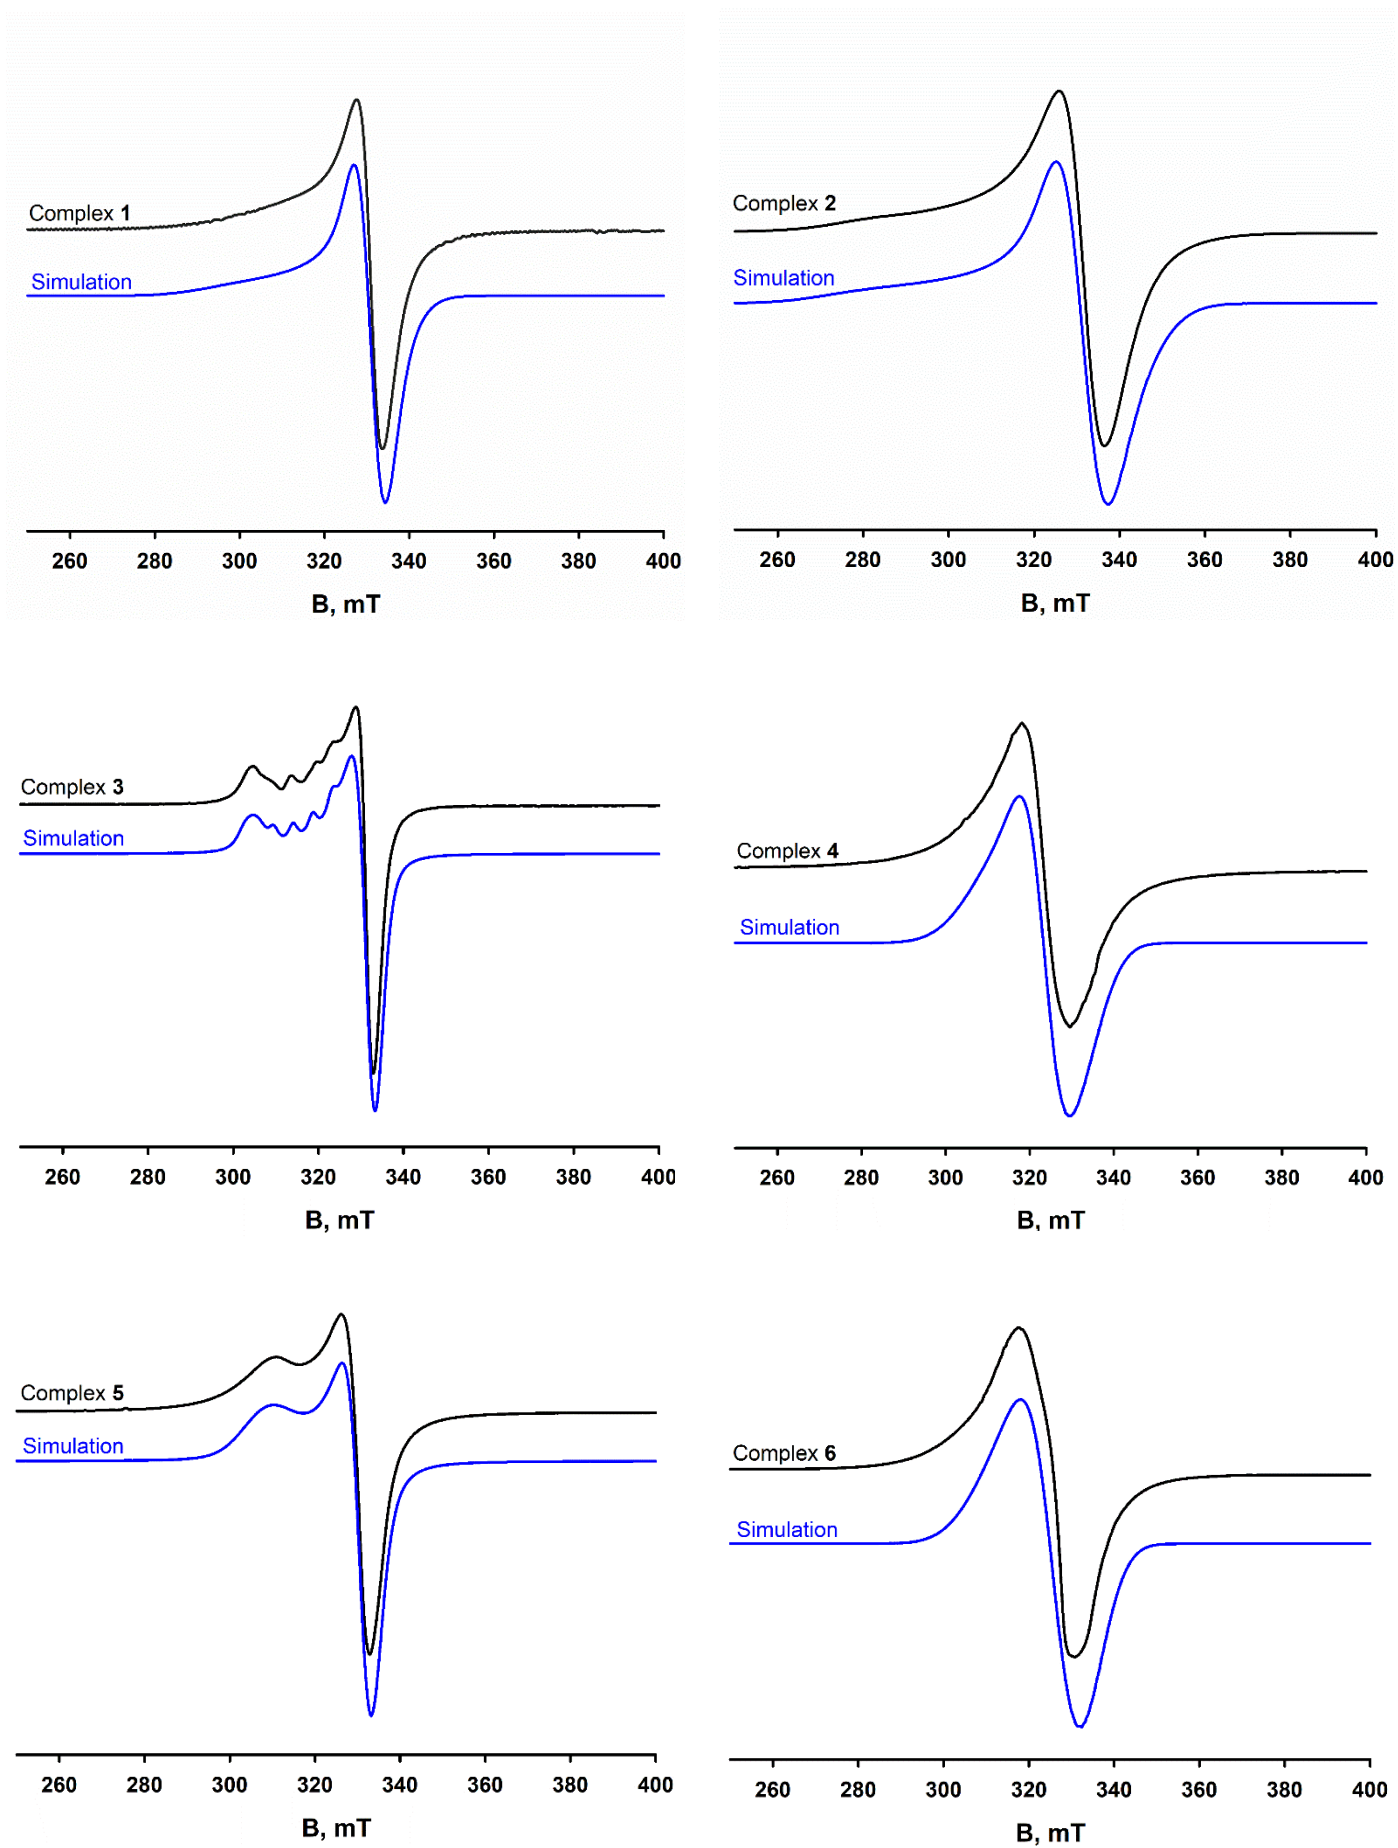

**Figure S7.** X-band EPR spectra of the polycrystalline samples of complex 1-6 at 77K. Spectrometer settings: microwave frequency 9.5 GHz, microwave power 2 mW.

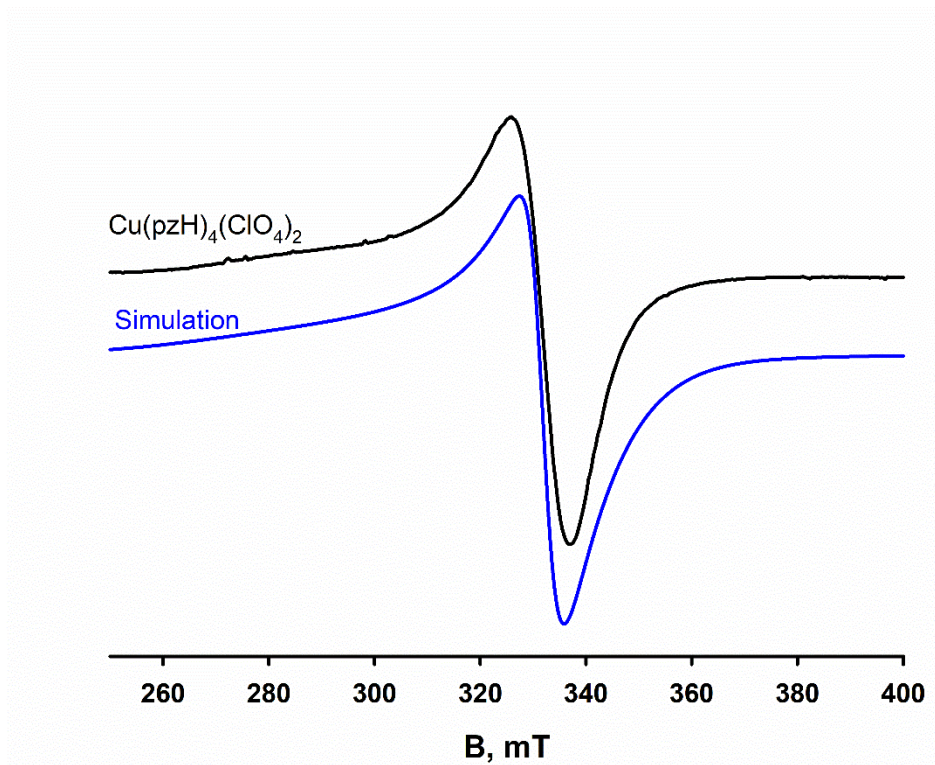

**Figure S8.** X-band EPR spectrum of the polycrystalline samples of complex  $[\text{Cu}(\text{pzH})_4(\text{ClO}_4)_2]$  at 77K. Spectrometer settings: microwave frequency 9.5 GHz, microwave power 2 mW.

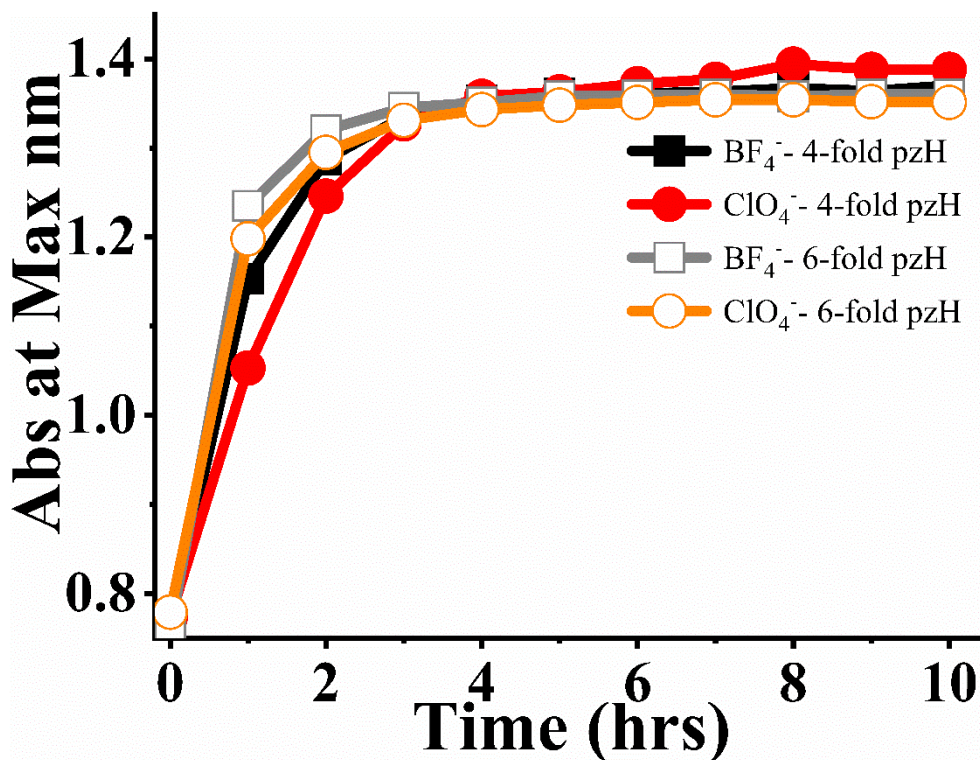

**Figure S9.** Time-dependent changes in the UV-vis spectrum from 0 to 10 hrs at 298 K for the formation of  $[\text{Cu}(\text{HN}=\text{C}(\text{Me})\text{pz})_2(\text{pzH})_2]^{2+}$  species, **1a**, from  $\text{Cu}(\text{ClO}_4)_2 \cdot 6\text{H}_2\text{O}$  or  $\text{Cu}(\text{BF}_4)_2$  (20 mM) and pZH in MeCN. The reactions were monitored by following the increasing absorption at 644 nm.

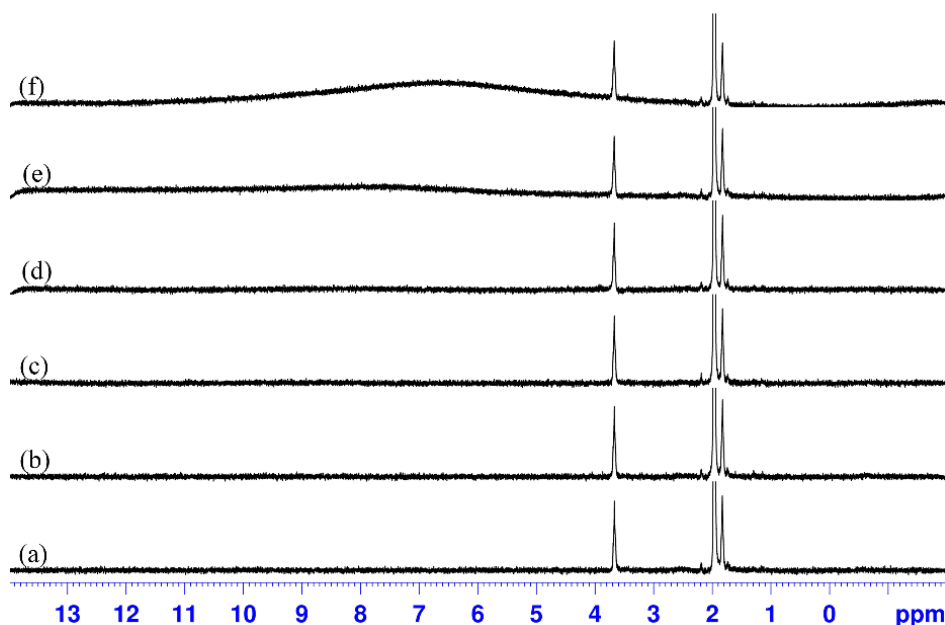

**Figure S10.** *In-situ* time-dependent  $^1\text{H}$  NMR studies of  $[\text{Cu}(\text{pzH})_4(\text{ClO}_4)_2]$  dissolved in  $\text{CD}_3\text{CN}$  (1.95 ppm) at 298 K, (a) 5 mins, (b) 1 hr, (c) 2 hrs, (d) 4 hrs, (e) 6 hrs, (f) 9 hrs. The peaks at 1.7 and 3.6 ppm are belong to THF.

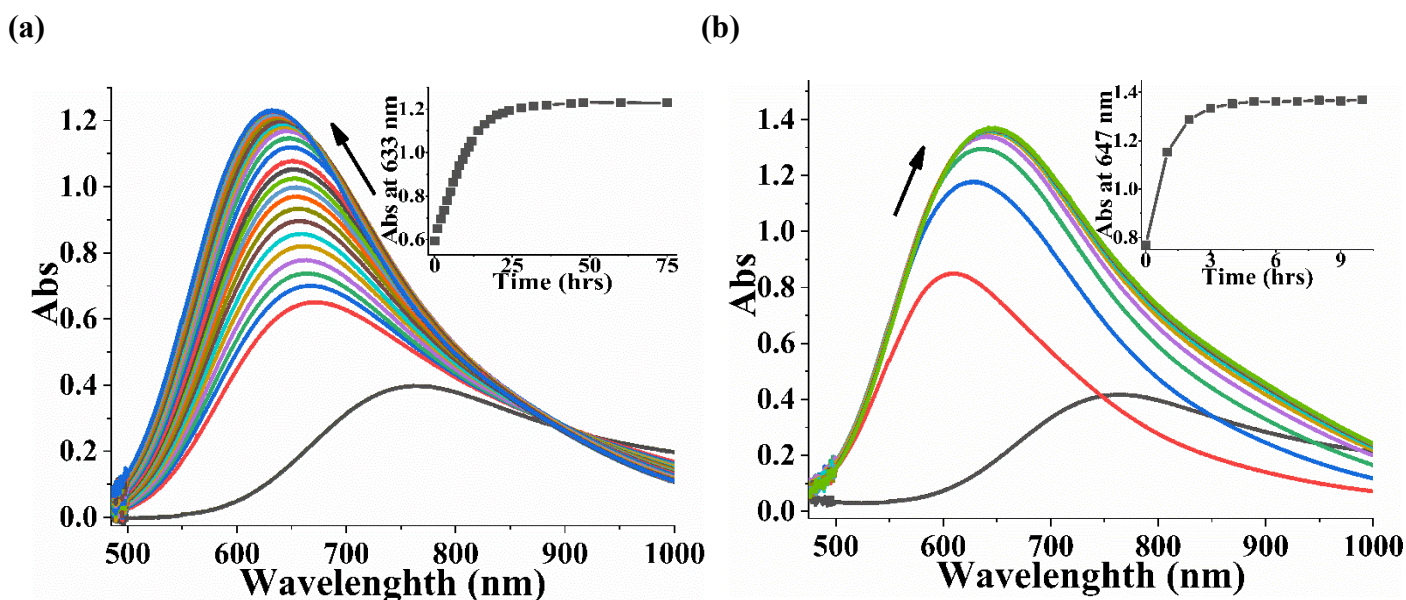

**Figure S11.** Time-dependent changes in the UV-vis spectrum from 0 to 75 hrs at 298 K for the formation of  $[\text{Cu}(\text{HN}=\text{C}(\text{Me})\text{pz})_2(\text{pzH})_2]^{2+}$  species from Cu(II) ion and pzH in MeCN.  $\text{Cu}(\text{BF}_4)_2 \cdot 6\text{H}_2\text{O}$  (20 mM) was reacted with 2-fold (a) or 4-fold (b) excess of pzH in MeCN. The spectrum with absorption band maximum at 650 nm is corresponding to pure  $\text{Cu}(\text{ClO}_4)_2 \cdot 6\text{H}_2\text{O}$  in MeCN. The reactions were monitored by following the increasing absorption at 633 or 647 nm (insets).

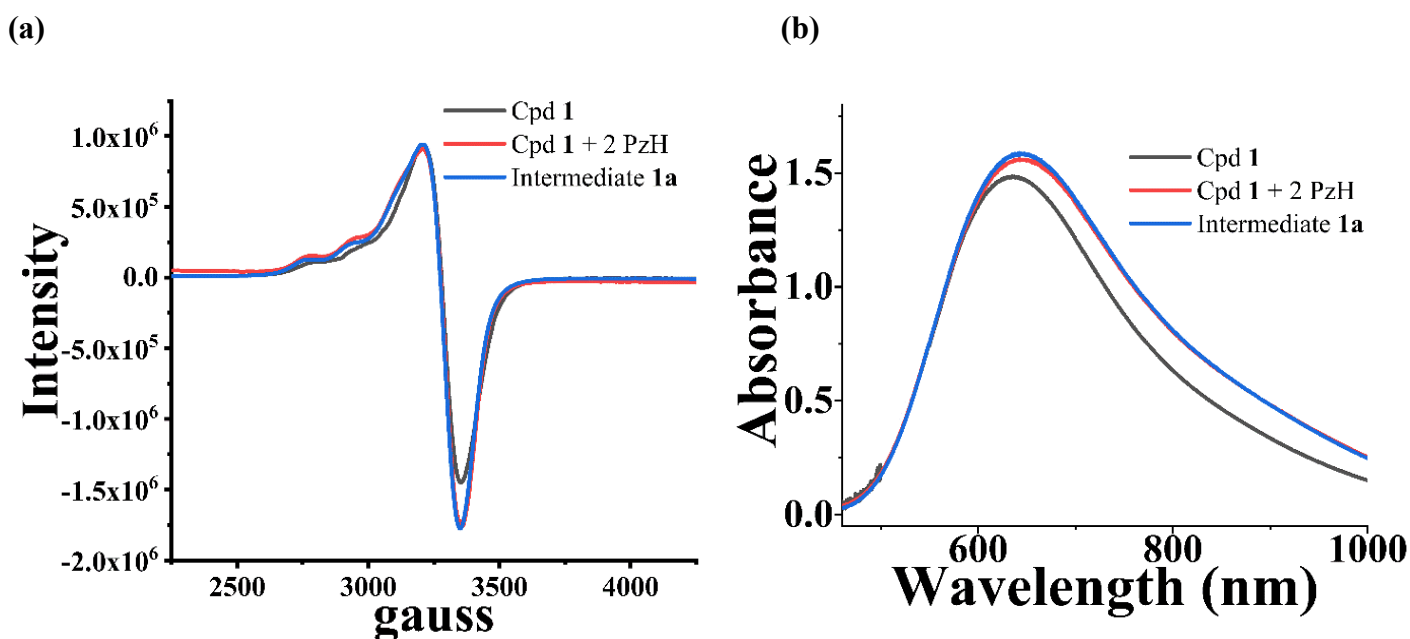

**Figure S12.** (a) X-band EPR spectra at 77K of complex **1** in MeCN (black line), complex **1** added with 2-fold pzH in MeCN (red line), and intermediate **1a** from the reaction of  $\text{Cu}(\text{ClO}_4)_2$  with 4-fold pzH in MeCN (blue line). Spectrometer settings: microwave frequency 9.505 GHz, microwave power 2 mW. (b) UV-vis spectra of complex **1** in MeCN (blue line), complex **1** added with 2-fold pzH in MeCN (red line), and **1a** from  $\text{Cu}(\text{ClO}_4)_2$  reacted with 4-fold pzH in MeCN (blue line) at 298 K.



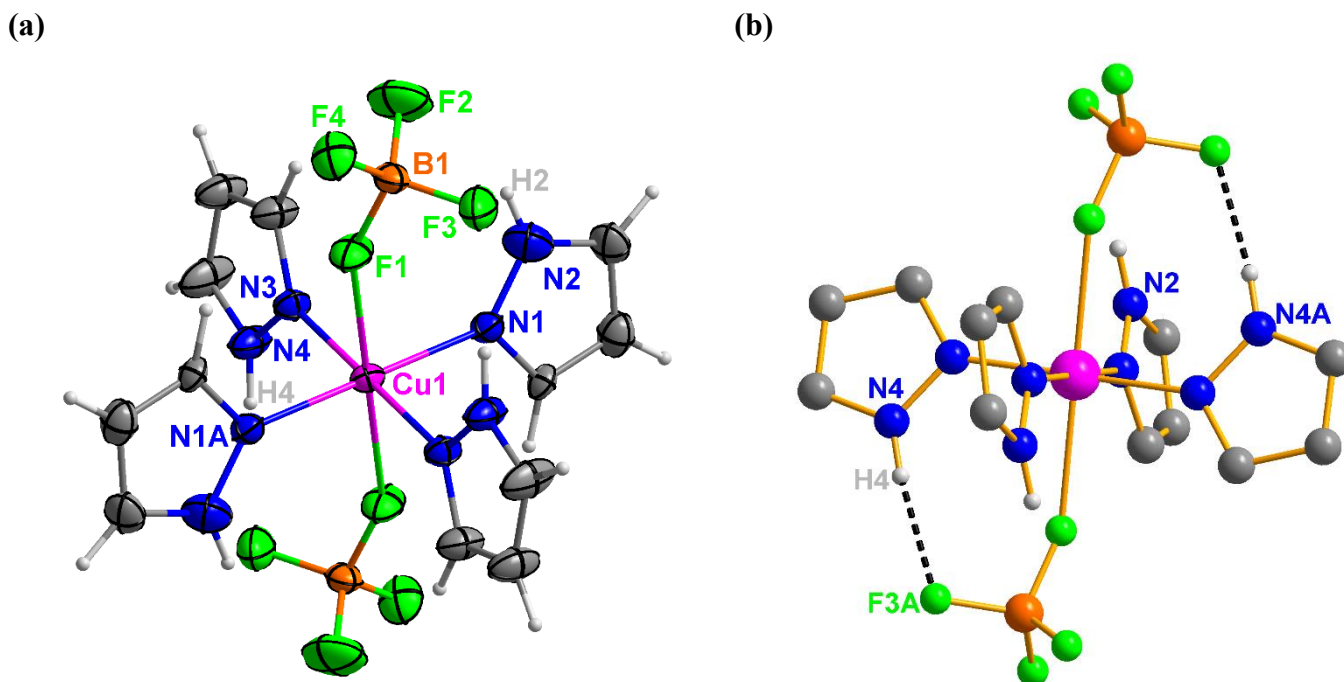

**Figure S13.** The Cu(II) ion in  $[\text{Cu}(\text{pzH})_4(\text{BF}_4)_2]$  lies on a crystallographic inversion center. (a) ORTEP drawings of  $[\text{Cu}(\text{pzH})_4(\text{BF}_4)_2]$ . Thermal ellipsoids are drawn at the 35 % probability level. Selected bond lengths [ $\text{\AA}$ ] and angles [ $^\circ$ ]: Cu1-N1 2.008(2), Cu1-N3 1.990(2), Cu1-F1 2.3888(16), N1-Cu1-N3 90.02(9), N1-Cu1-N3A 89.98(9), N1-Cu1-F1 94.45(8), N3-Cu1-F1 90.17(8). (b) Balls and sticks representation of  $[\text{Cu}(\text{pzH})_4(\text{BF}_4)_2]$  with black dash lines showing the intramolecular NH $\cdots$ F hydrogen-bond interactions. No obvious intermolecular NH $\cdots$ F hydrogen-bond interactions was observed. Hydrogen bonding interactions: N4 $\cdots$ F3A 2.9426(30)  $\text{\AA}$ , H4 $\cdots$ F3A 2.0690(18)  $\text{\AA}$ , N4-H4 $\cdots$ F3A 171.9(2) $^\circ$ . Symmetry code: A 0.5-x, 0.5-y, -z.
